# Supplementary material for: Designing a yolk–shell type porous organic network using a phenyl modified template
Source: Royal Society of Chemistry journal article supplement (doi:10.1039/c4cc02837f), 2014-01-01
Supplement: c4cc02837f1.pdf [file c4cc02837f1.pdf]

Electronic Supplementary Information for

**Designing yolk/shell type porous organic network using  
phenyl modified template**

Song Shi,<sup>a,b</sup> Chen Chen,<sup>a</sup> Min Wang,<sup>a</sup> Jiping Ma,<sup>a</sup> Hong Ma,<sup>a</sup> and Jie Xu<sup>a\*</sup>

<sup>a</sup> *Dalian National Laboratory for Clean Energy, State Key Laboratory of Catalysis,  
Dalian Institute of Chemical Physics, Chinese Academy of Sciences, Dalian, 116023,  
P. R. China. E-mail: [xujie@dicp.ac.cn](mailto:xujie@dicp.ac.cn); Fax: +86-411-84379245; Tel:*

*+86-411-84379245*

<sup>b</sup> *Graduate University of Chinese Academy of Sciences, Beijing, 100049, P. R. China*

\*Corresponding author: E-mail: [xujie@dicp.ac.cn](mailto:xujie@dicp.ac.cn)

## Experiment

### Materials:

Methanol (AR), tetraethyl orthosilicate (TEOS) (AR) and ammonium hydroxide (28-30 wt% AR) were purchased from Tianjin Kermel Reagent Co. Ltd. All of the materials were used as received without further purification. phenyltriethoxysilane (PTES) (97%) was from Alfa Aesar. Raw material of CHHP was a cyclohexane solution provided by Liaoyang Synthetic Fiber Co. Ltd. (China)

### Synthesis of Au NPs:

2 mL of 1 wt%  $\text{HAuCl}_4$  was added into 50 mL deionized water, followed by 5 mL 38.8 M citrate sodium solution and then the mixture was heated under reflux for 30 min. Finally, the resultant colloid was cooled to room temperature and 13 nm gold nanoparticles were obtained.

### Synthesis of core/shell nanoparticle Au@Ph-SiO<sub>2</sub>:

A fresh solution of polyvinylpyrrolidone (0.3 mL, 12.8 mg/mL) was added to a previously prepared Au NPs solution. The resultant mixture was stirred for 24 h to allow complete adsorption of the polymer on the gold surface. Then, the solution was centrifuged (20000 rpm, 20 min) and the supernatant was removed. The volume of the concentrated colloid was then adjusted to 10 mL by dilution with ethanol. The colloid was under ultrasonic for 15 min, followed by addition of ethanol (20 mL) and concentrated ammonia solution (1.65 mL, 28–30 wt%  $\text{NH}_3$  in water). Afterwards, a solution of TEOS (1.15 mL), PTES (0.15 mL) in ethanol (1.5 mL) was added. The reaction mixture was then stirred for additional 24 h at room temperature. The resultant colloid was centrifuged and washed with water and ethanol and dried at 353 K.

### Synthesis of core/shell nanoparticle Au@SiO<sub>2</sub>:

A fresh solution of polyvinylpyrrolidone (0.3 mL, 12.8 mg/mL) was added to a previously prepared Au NPs solution. The resultant mixture was stirred for 24 h to allow complete adsorption of the polymer on the gold surface. Then, the solution was centrifuged (20000 rpm, 20 min) and the supernatant was removed. The volume of the concentrated colloid was then adjusted to 10 mL by dilution with ethanol. The colloid was under ultrasonic for 15 min, followed by addition of ethanol (20 mL) and concentrated ammonia solution (1.65 mL, 28–30 wt%  $\text{NH}_3$  in water). Afterwards, a solution of TEOS (1.3 mL) in ethanol (1.5 mL) was added. The reaction mixture was then stirred for additional 24 h at room temperature. The resultant colloid was centrifuged and washed with water and ethanol and dried at 353 K.

### **Synthesis of Au@Si-PON:**

100 mg of Au@Ph-SiO<sub>2</sub> was dispersed in 0.5 mL for 30 min under ultrasound, then 0.88 mL FDA and 0.54 mL toluene were added into the mixture, then the mixture was ultrasounded for another 30 min. 0.5 g FeCl<sub>3</sub> was added, followed by stirred under 80 °C for 19 h. 5 ml dichloromethane was added after the solid was cooled down. After swollen at room temperature for 10 h, another 1.5 g FeCl<sub>3</sub> was added followed by reaction at 80 °C for 12 h. Then the obtained mixture was washed with methanol and water, then the mixture was under Soxhlet's extractor for 24 h under methanol.

### **Synthesis of Au/Si-PON:**

100 mg of Au@SiO<sub>2</sub> was dispersed in 0.5 mL for 30 min under ultrasound, then 0.88 mL FDA and 0.54 mL toluene were added into the mixture, then the mixture was ultrasounded for another 30 min. 0.5 g FeCl<sub>3</sub> was added, followed by stirred under 80 °C for 19 h. 5 ml dichloromethane was added after the solid was cooled down. After swollen at room temperature for 10 h, another 1.5 g FeCl<sub>3</sub> was added followed by reaction at 80 °C for 12 h. Then the obtained mixture was washed with methanol and water, then the mixture was under Soxhlet's extractor for 24 h under methanol.

### **Synthesis of yolk/shell type Au@PON:**

0.1 g of the obtained Au@Si-PON nanocomposites were dispersed in 20 g methanol for at least 2 h, then 2 g 5 wt% HF solution were added into the turbid liquid. The mixture was stirred vigorously for 25 min at room temperature. The resultant colloid was centrifuged and washed with water and methanol and dried at 353 K.

### **Synthesis of Au/PON**

0.1 g of the obtained Au/Si-PON nanocomposites were dispersed in 20 g methanol for at least 2 h, then 2 g 5 wt% HF solution were added into the turbid liquid. The mixture was stirred vigorously for 25 min at room temperature. The resultant colloid was centrifuged and washed with water and methanol and dried at 353 K.

### **Catalytic decomposition of CHHP:**

The reaction was carried out in a 50 mL stainless steel autoclave under magnetic stirring. In a typical procedure, 0.05 g catalyst and 5 mL of n-heptane solution containing cyclohexyl hydroperoxide (0.309 mmol/mL) were added in the reactor. The reaction was conducted at a certain temperature for 30 min under N<sub>2</sub> atmosphere.

### **Analysis of products**

The products were identified by an Agilent 6890N GC/5973 MS detector and

quantitated by an Agilent 7890D GC equipped with a HP-5 column (30 m  $\times$  0.25 mm  $\times$  0.3  $\mu$ m) and titration. After transformation of the hydroperoxide into cyclohexanol by adding triphenylphosphine to the reaction mixture, cyclohexanol and cyclohexanone were determined by internal standard method using nonane as an internal standard. The concentration of CHHP was determined by iodometric titration and the acid and ester by acid-base titration. The selectivity of cyclohexanol and cyclohexanone was calculated by combining the result of GC of cyclohexanol or cyclohexanone and the iodometric titration of CHHP.

### **Characterization:**

Fourier transform infrared (FT-IR) spectra were collected between 4000 and 400  $\text{cm}^{-1}$  on a Bruker Tensor 27 spectrometer in KBr media. UV-vis spectra were measured on Shimadzu UV-2550. Transmission electron microscope (TEM) was measured on JEM 2000EX. The size distribution of the nanoparticles was measured from the TEM images, and at least one hundred spheres were counted.  $\text{N}_2$  adsorption-desorption isomer was performed on Quantachrome Autosorb-1, Water contact angles were performed on contact angle measuring system JC 2000 C1. The X-ray powder diffraction (XRD) patterns were obtained using Rigaku D/Max 2500/PC powder diffractometer with Cu  $K\alpha$  radiation ( $\lambda = 0.15418 \text{ nm}$ ). The nuclear magnetic resonance spectra of  $^{29}\text{Si}$  cross polarization/magic-angle spinning nuclear magnetic resonance ( $^{29}\text{Si}$  CP/MAS NMR) were performed on a Bruker DRX-400 spectrometer at 79.5 MHz with a spinning frequency of 4 kHz. The nuclear magnetic resonance spectra of  $^{13}\text{C}$  cross polarization/magic-angle spinning nuclear magnetic resonance ( $^{13}\text{C}$  CP/MAS NMR) were performed on a Bruker DRX-400 spectrometer at spinning frequency of 6 and 8 kHz. HR-TEMs were performed on JEM-2100. Thermal gravity analysis (TGA) measurements were carried out on a NETZSCH STA 409 PC instrument.

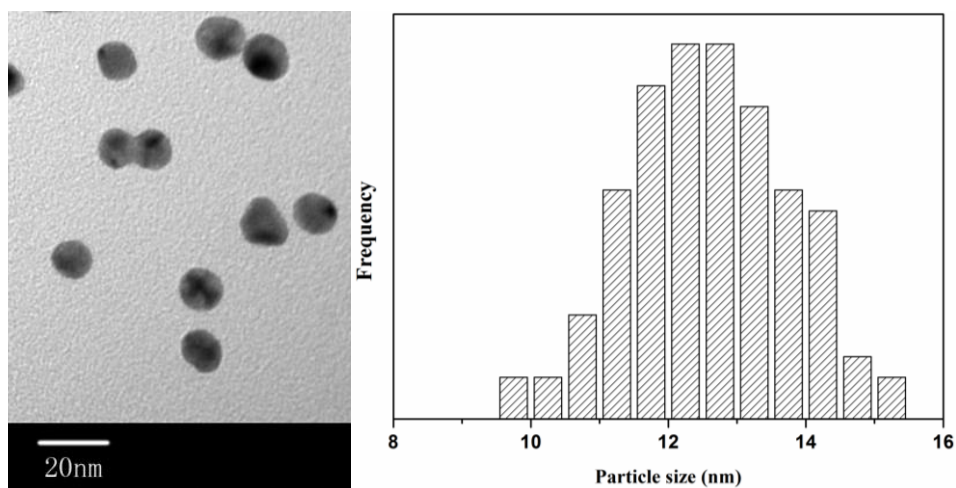

**Fig. S1** TEM image and size distribution of the fresh prepared Au NPs

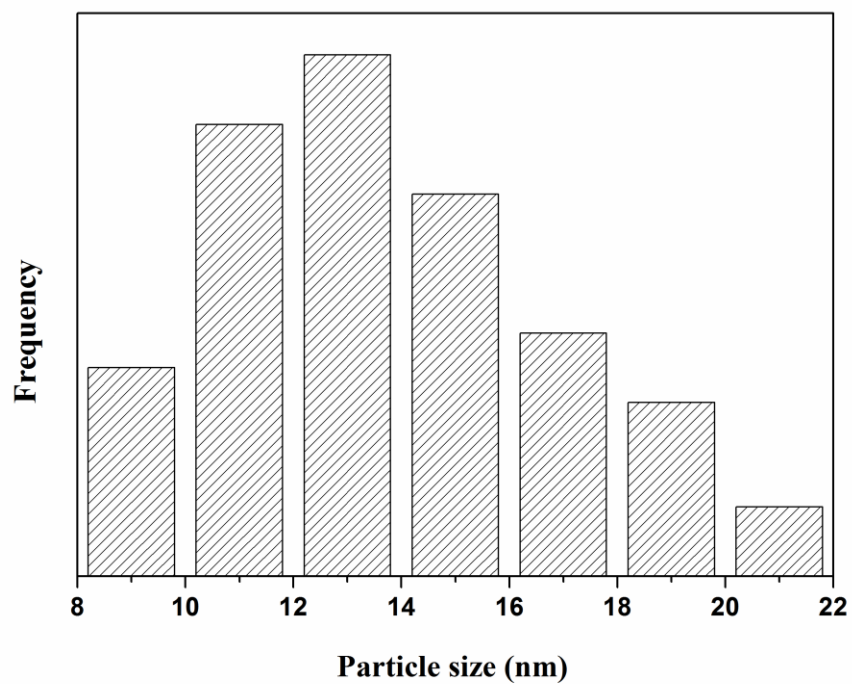

**Fig. S2** Size distribution of the Au cores in Au@Ph-SiO<sub>2</sub>

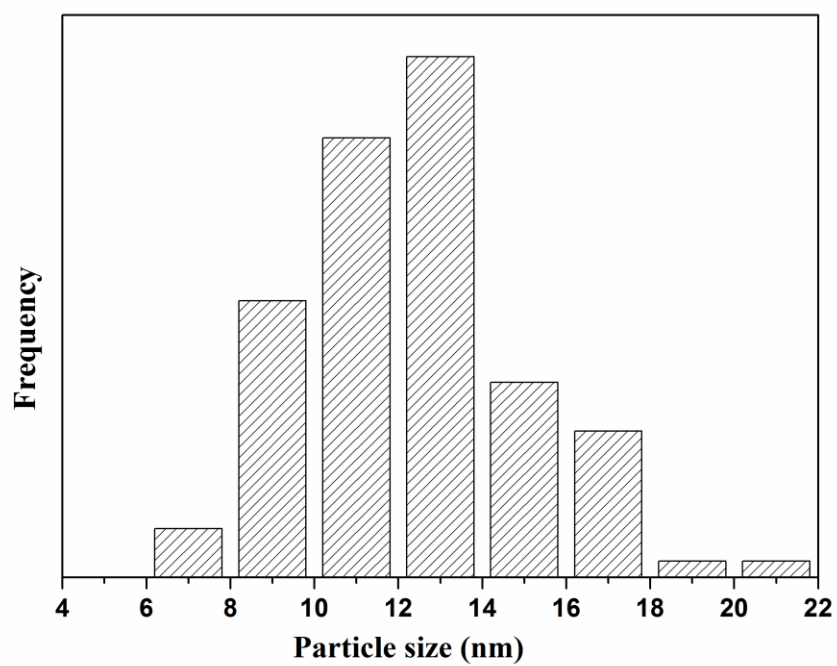

**Fig. S3** Size distribution of the Au cores in Au@Si-PON

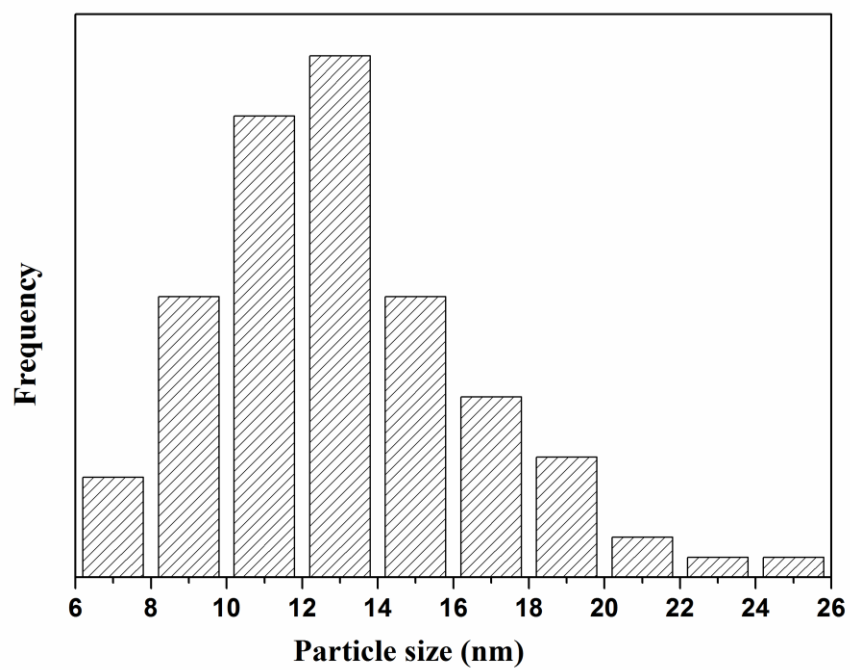

**Fig. S4** Size distribution of the Au cores in Au@PON

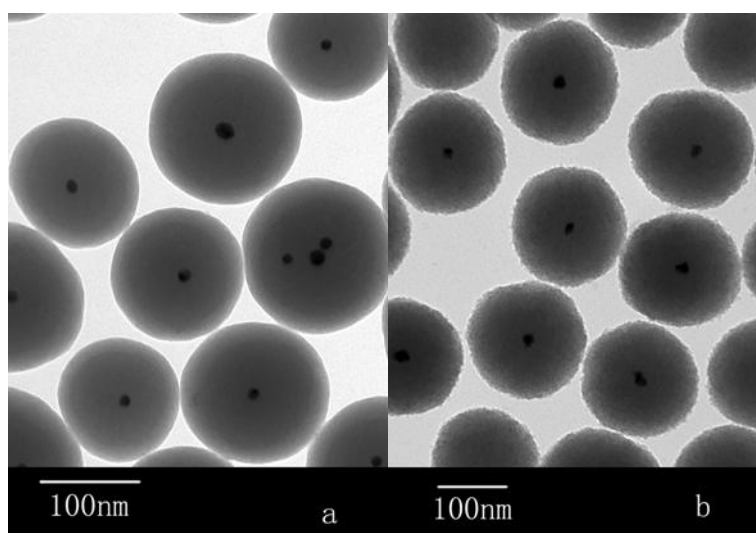

**Fig. S5** TEM images of a) Au@SiO<sub>2</sub> and b) Au@Ph-SiO<sub>2</sub>

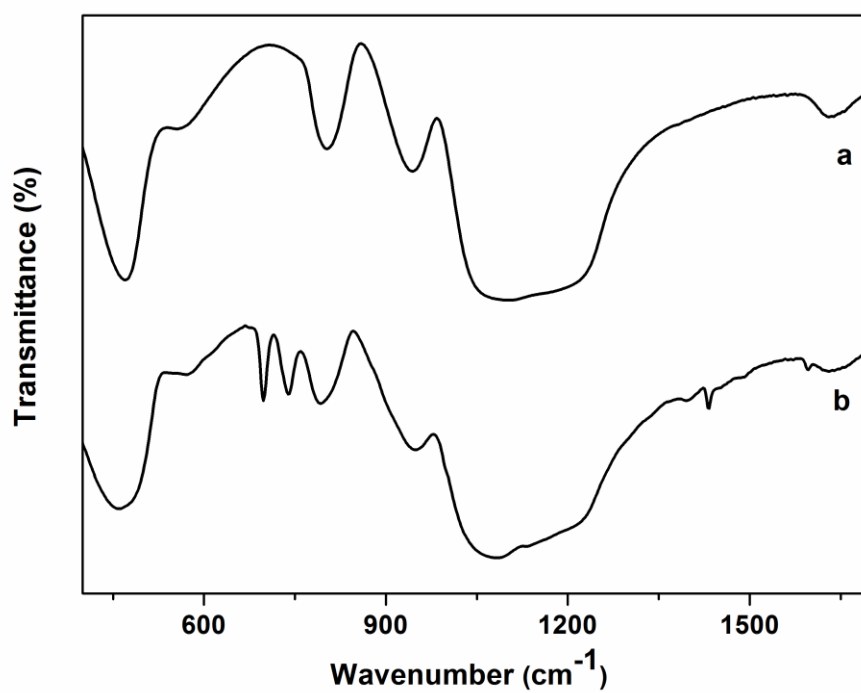

**Fig. S6** FT-IR spectra of a) Au@SiO<sub>2</sub> and b) Au@Ph-SiO<sub>2</sub>

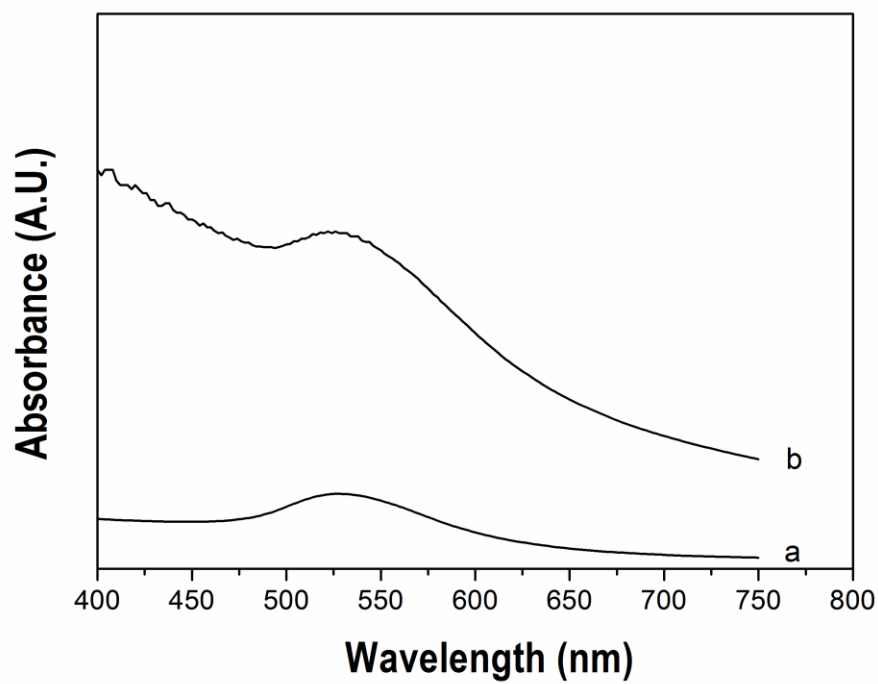

**Fig. S7** UV-Vis spectra of the a) Au NPs and b) Au@Ph-SiO<sub>2</sub>

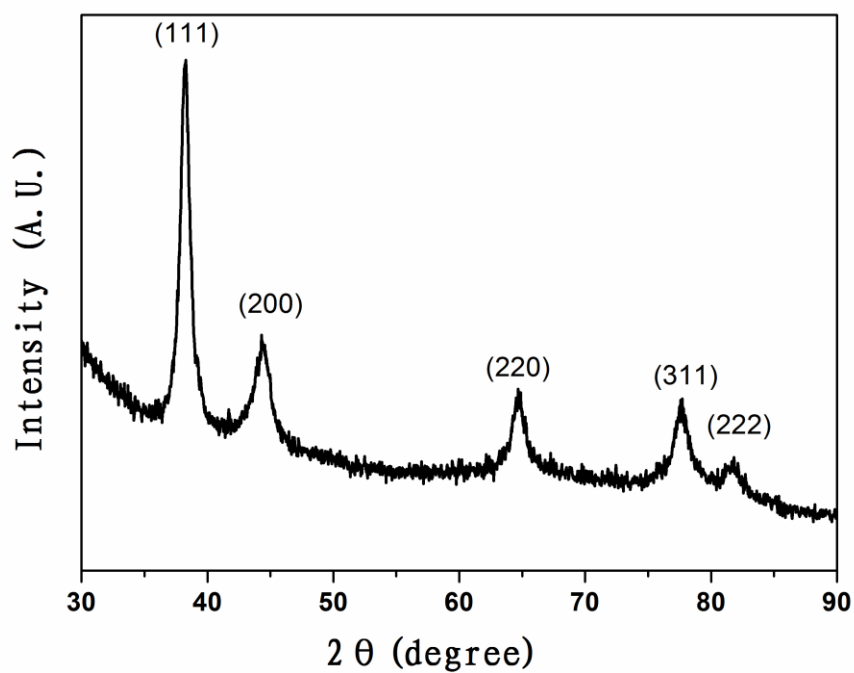

**Fig. S8** XRD pattern of Au@Ph-SiO<sub>2</sub>



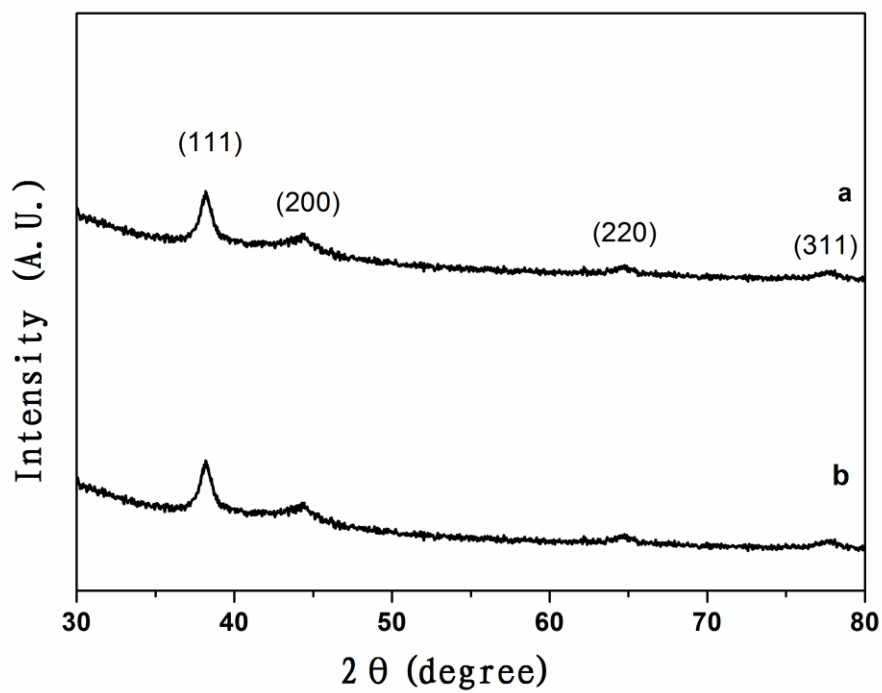

**Fig. S9** XRD pattern of a) Au@Si-PON and b) Au@PON

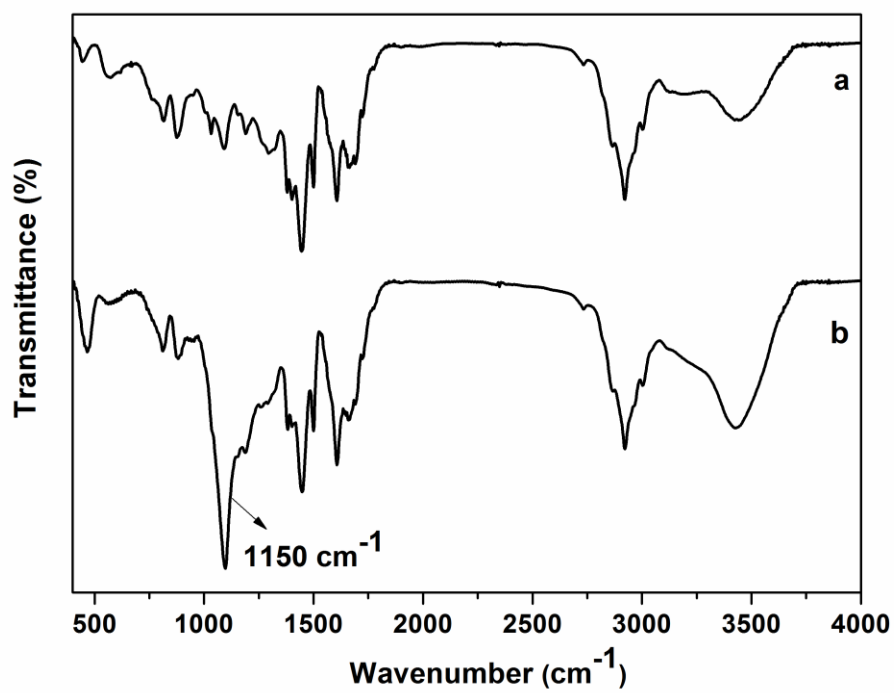

**Fig. S10** FT-IR spectra of a) Au@PON and b) Au@Si-PON

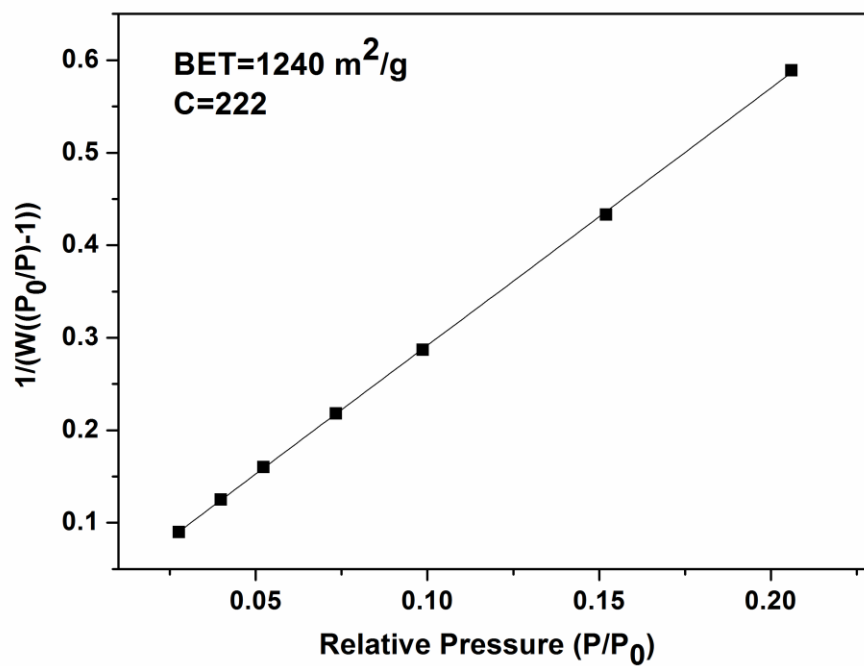

**Fig. S11** BET plot of the Au@Si-PON

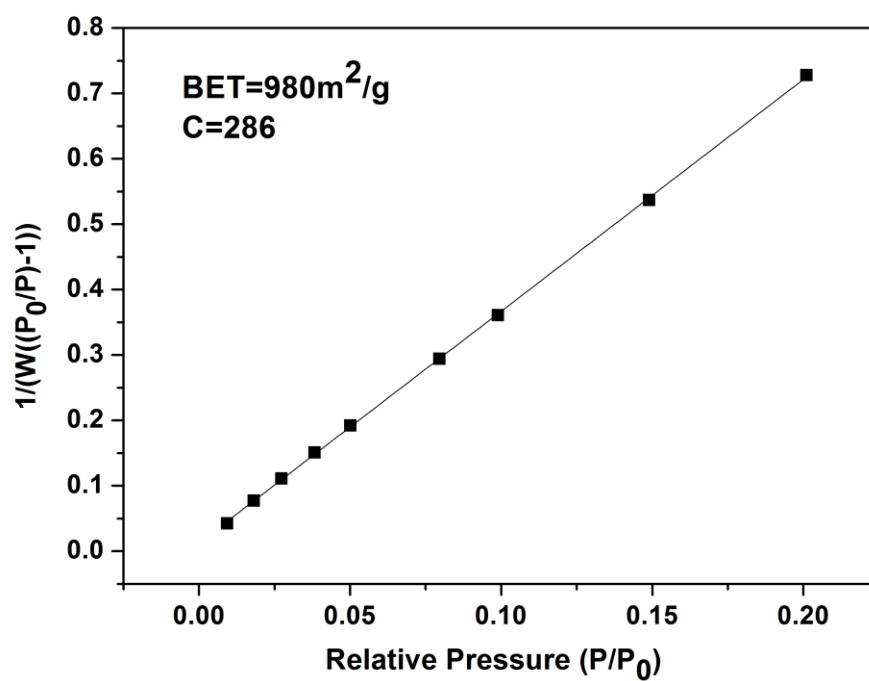

**Fig. S12** BET plot of the Au@PON

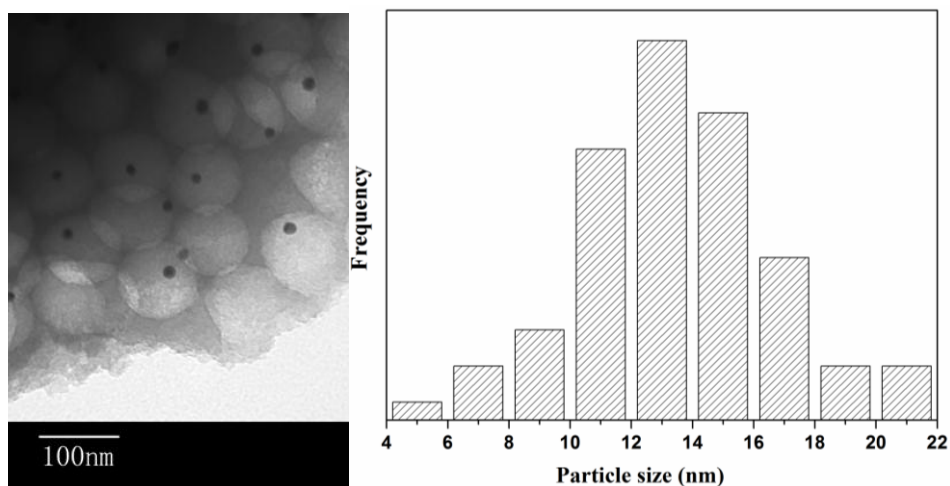

**Fig. S13** TEM image of Au@PON after thermal treatment and the size distribution of the Au cores in Au@PON

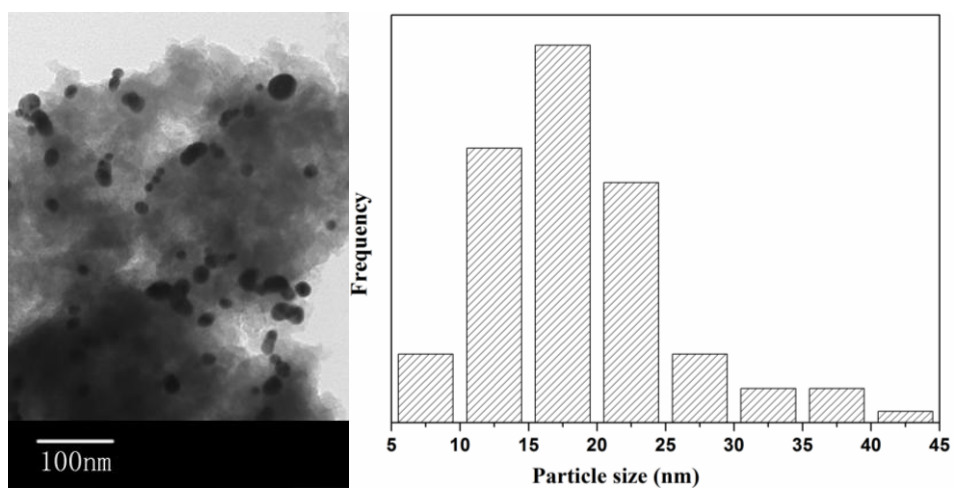

**Fig. S14** TEM image of Au/PON after thermal treatment and the size distribution of the Au cores in Au/PON

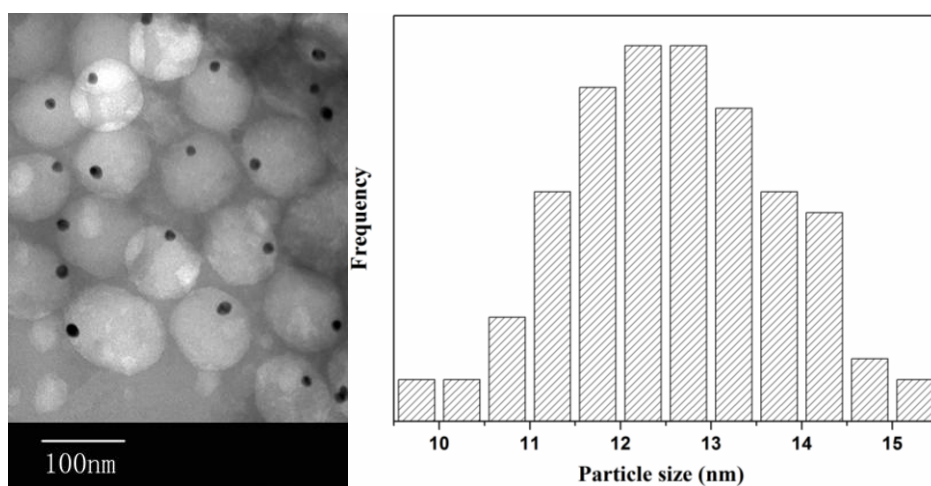

**Fig. S15** TEM image of Au@PON after reaction and the size distribution of the Au cores in Au@PON

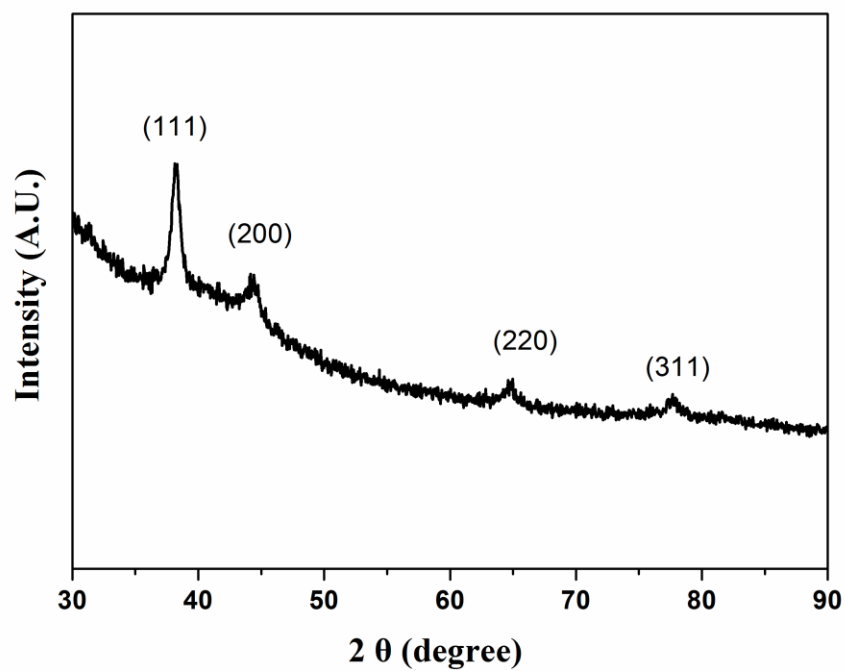

**Fig. S16** XRD pattern of Au@PON after reaction

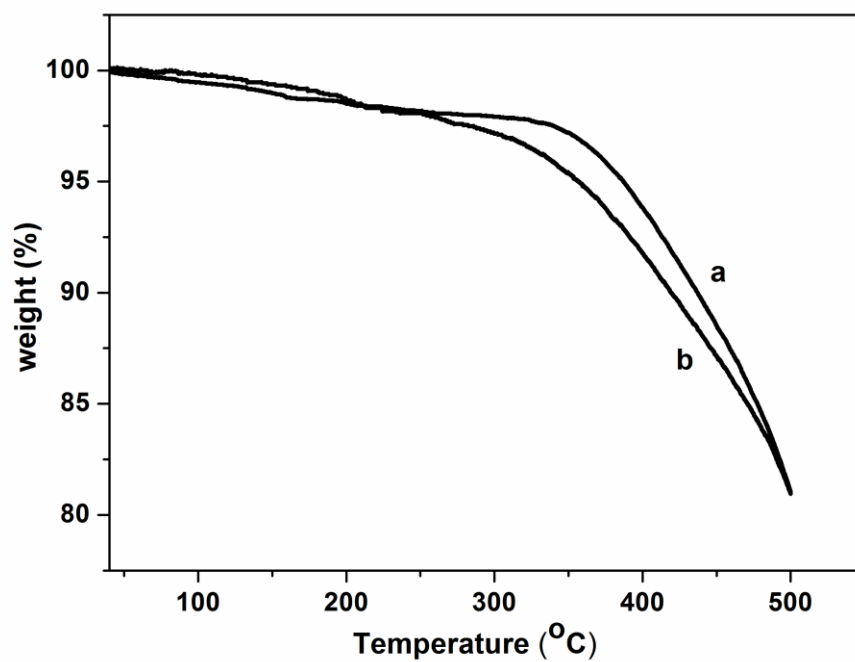

**Fig. S17** TGA curves of a) Au@Si-PON and b) Au@PON

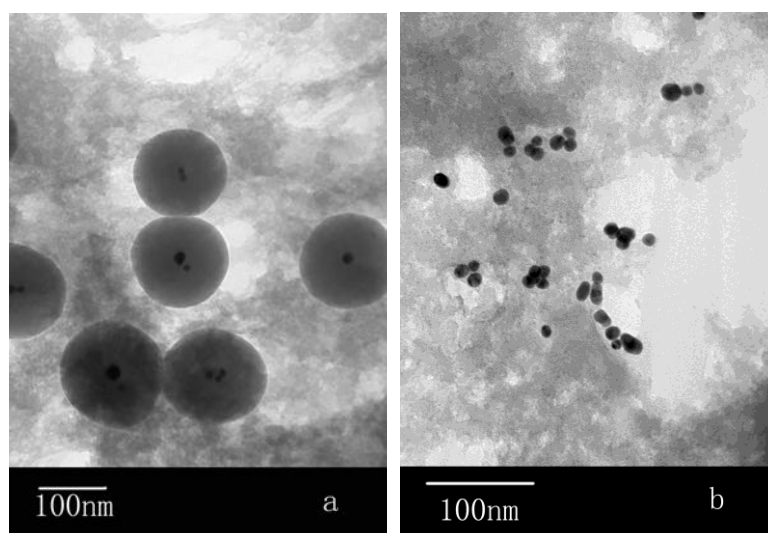

**Fig. S18** TEM images for a) Au@SiO<sub>2</sub> dispersed on the PON and b) Au/PON

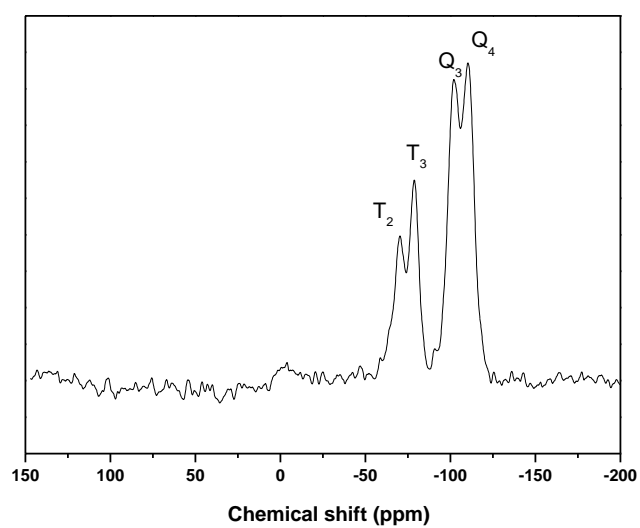

**Fig. S19** <sup>29</sup>Si CP/MAS NMR of Au@Ph-SiO<sub>2</sub>

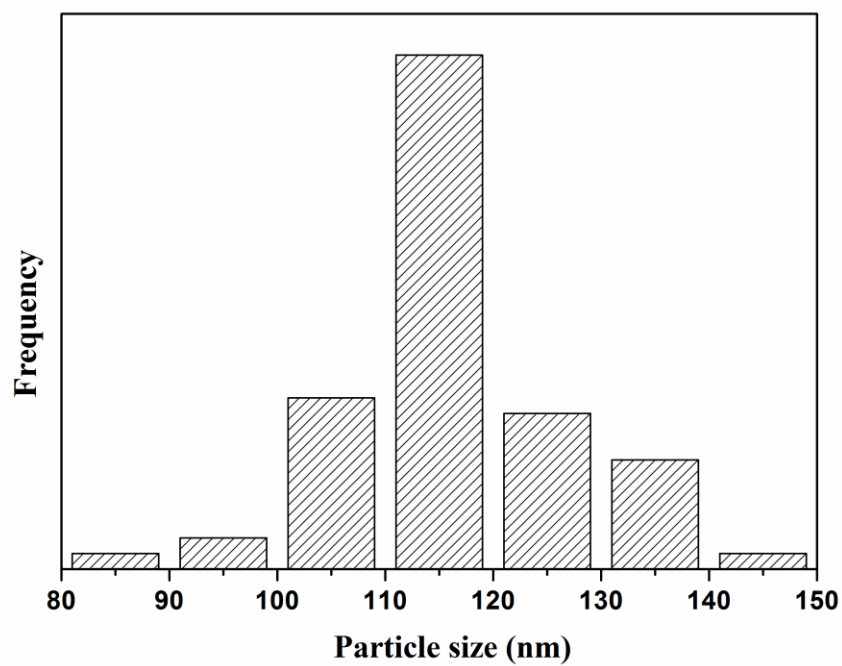

**Fig. S20** Size distribution of Au@Ph-SiO<sub>2</sub>

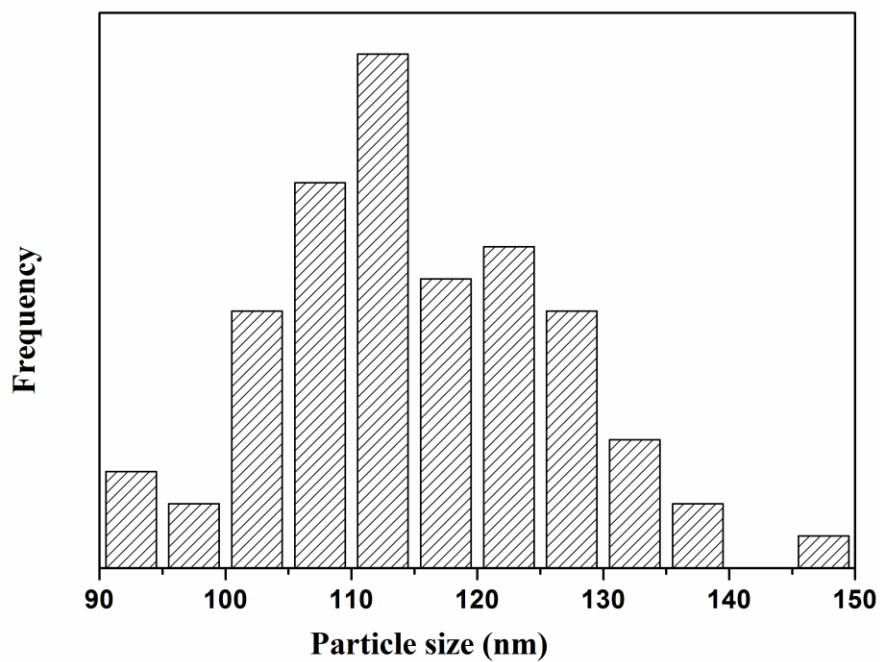

**Fig. S21** Size distribution of the caves in Au@PON

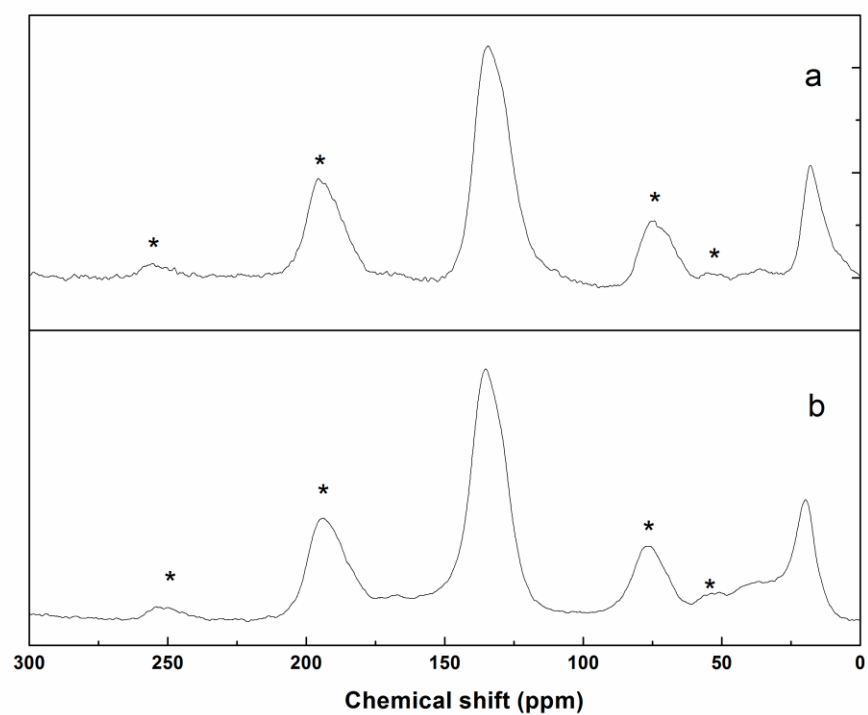

**Fig. S22**  $^{13}\text{C}$  CP/MAS NMR at the spinning rate of 6 Kz of a; Au@Si-PON; b; Au@PON, \* Spinning sidebands

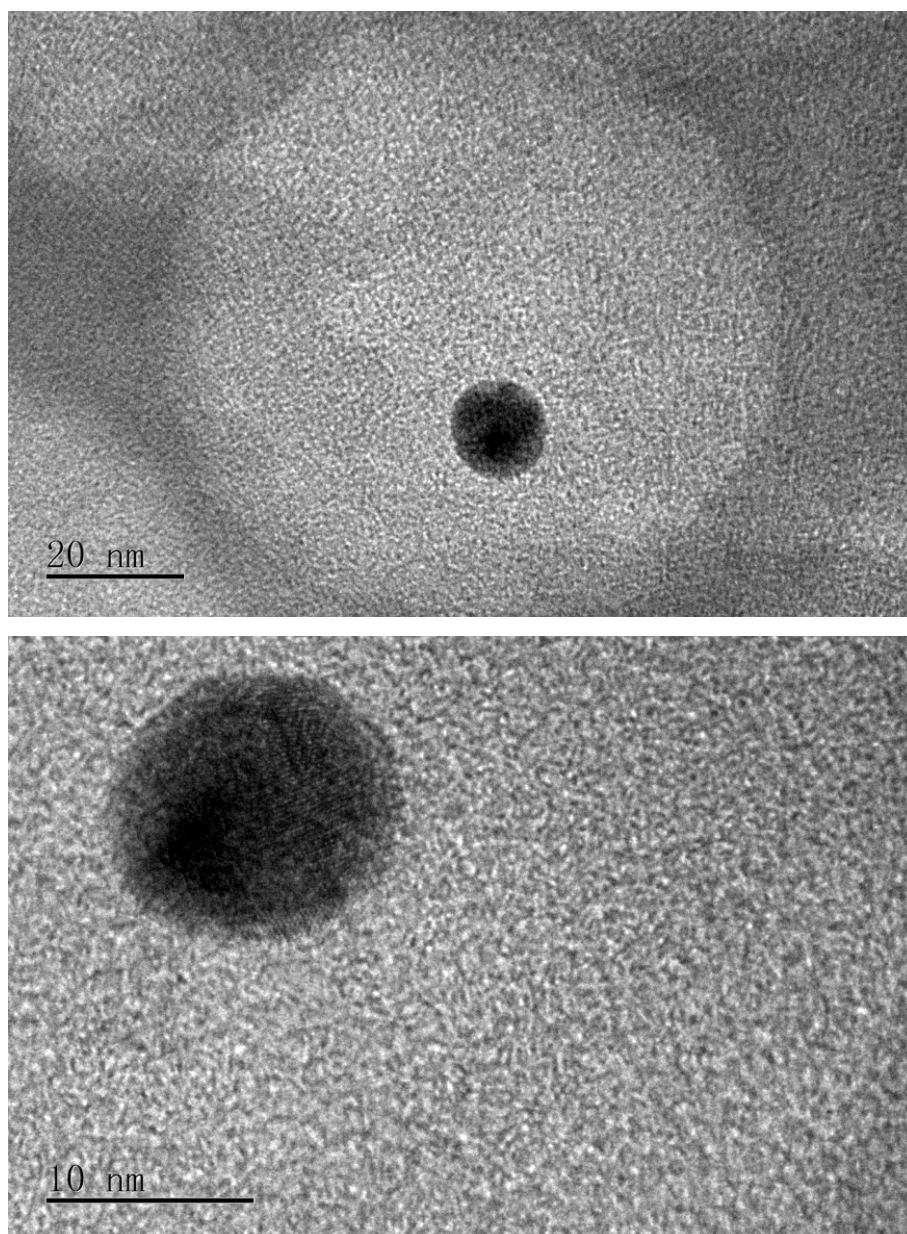

**Fig. S23** HR-TEM images of Au@PON



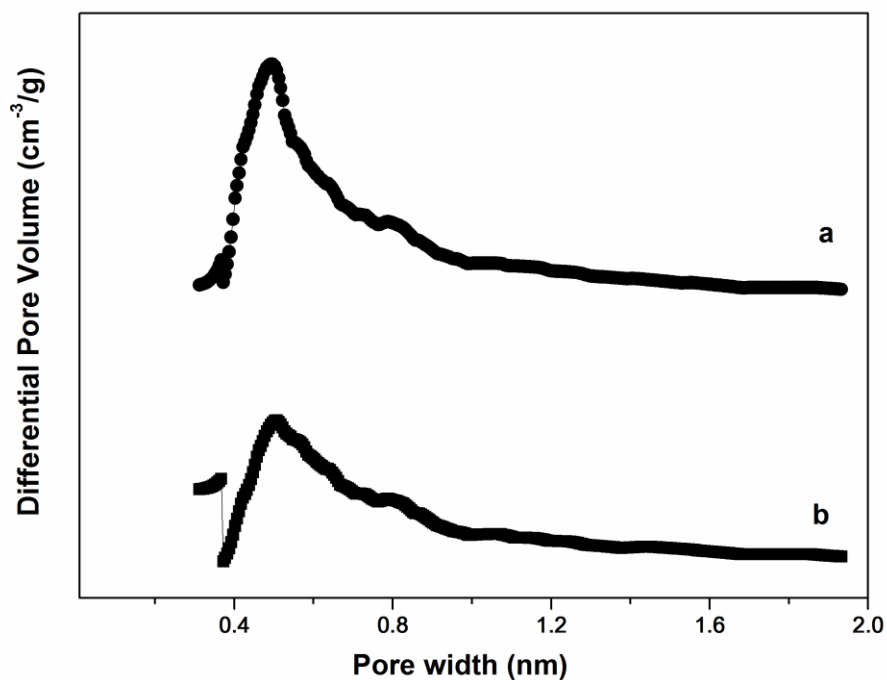

**Fig. S24** Pore size distributions calculated using HK methods; a) Au@Si-PON; b) Au@PON

**Table S1**

|                  | $S_{\text{BET}}$ (m <sup>2</sup> /g) <sup>a</sup> | Pore Volume<br>(cm <sup>3</sup> /g) <sup>b</sup> | $S_{\text{BET-micro}}$<br>(m <sup>2</sup> /g) <sup>c</sup> | Pore Volume<br>micro(cm <sup>3</sup> /g) <sup>d</sup> |
|------------------|---------------------------------------------------|--------------------------------------------------|------------------------------------------------------------|-------------------------------------------------------|
| <b>Au@Si-PON</b> | 1240                                              | 1.03                                             | 404                                                        | 0.17                                                  |
| <b>Au@PON</b>    | 980                                               | 0.81                                             | 384                                                        | 0.17                                                  |

a) Surface area calculated from the N<sub>2</sub> adsorption isotherm using the BET method; b) Total pore volume at P/P<sub>0</sub>=0.99; c) Micropore surface area calculated from the N<sub>2</sub> adsorption isotherm using t-plot method; d) The micropore volume using the t-plot method based on the Halsey thickness equation.
